# Supplementary material for: The Effects of Tai Chi Chuan Versus Core Stability Training on Lower-Limb Neuromuscular Function in Aging Individuals with Non-Specific Chronic Lower Back Pain
Source: PubMed Central journal article supplement (PMC6473361; doi:10.3390/medicina55030060), 2019-03-03
Supplement: medicina-55-00060-s001.pdf [file medicina-55-00060-s001.pdf]

**Table S1.** VAS, neuromuscular function of knee at baseline and 12 weeks in Tai Chi Chuan group, Core Stability group and Control group.

| Parameters               | Tai Chi Chuan  |                | Core Stability Training |               | Control        |                |
|--------------------------|----------------|----------------|-------------------------|---------------|----------------|----------------|
|                          | Baseline       | Week 12        | Baseline                | Week 12       | Baseline       | Week 12        |
| PT (Nm): 60°/s           |                |                |                         |               |                |                |
| right extension          | 93.14 ± 24.86  | 100.17 ± 28.07 | 74.94 ± 16              | 81.21 ± 22.36 | 68.05 ± 14.35  | 70.16 ± 14.59  |
| left extension           | 56.7 ± 18.97   | 77.2 ± 18.21   | 55.12 ± 18.14           | 59.34 ± 20.13 | 50.14 ± 14.87  | 54.35 ± 15.47  |
| right flexion            | 77.77 ± 23.92  | 91.36 ± 36.81  | 74.51 ± 21.69           | 79.9 ± 23.12  | 68.22 ± 14.2   | 75.3 ± 14.66   |
| left flexion             | 51.95 ± 12.06  | 65.66 ± 16.58  | 46.63 ± 17.33           | 55.66 ± 17.53 | 48.22 ± 14.2   | 51.23 ± 14.1   |
| PT/weight (Nm/kg): 60°/s |                |                |                         |               |                |                |
| right extension          | 158.18 ± 27.87 | 164.34 ± 29.92 | 117.62 ± 22.07          | 126.32 ± 26.1 | 111.37 ± 32.67 | 116.3 ± 27.73  |
| left extension           | 96.29 ± 22.1   | 113.68 ± 23.37 | 85.23 ± 21.03           | 91.11 ± 23.95 | 99.36 ± 18.64  | 107.06 ± 17.39 |
| right flexion            | 133.58 ± 34.5  | 153.36 ± 44.4  | 117.13 ± 34.1           | 123.3 ± 23.61 | 109.59 ± 28.27 | 121.1 ± 29.63  |
| left flexion             | 88.68 ± 13.43  | 95.13 ± 17.79  | 71.86 ± 21.18           | 85.28 ± 17.6  | 66.15 ± 24.6   | 71.93 ± 18.58  |
| Endurance: (60°/s)       |                |                |                         |               |                |                |
| right extension          | 0.9 ± 0.21     | 1.24 ± 0.3     | 1.11 ± 0.44             | 1.04 ± 0.16   | 1.02 ± 0.4     | 0.88 ± 0.19    |
| Right flexion            | 1.08 ± 0.33    | 1.45 ± 0.52    | 0.98 ± 0.37             | 1.04 ± 0.41   | 1.08 ± 0.3     | 0.93 ± 0.2     |
| left flexion             | 0.91 ± 0.35    | 1.17 ± 0.39    | 0.79 ± 0.26             | 1.02 ± 0.26   | 0.99 ± 0.45    | 1.15 ± 0.67    |
| PT (Nm): 180°/s          |                |                |                         |               |                |                |
| right extension          | 53.7 ± 20.9    | 53.2 ± 18.7    | 45.55 ± 12.78           | 52.47 ± 16.86 | 46.14 ± 11.13  | 49.53 ± 13.43  |
| left extension           | 41.8 ± 10.91   | 43.6 ± 10.09   | 39.22 ± 10.44           | 45 ± 13.43    | 37.23 ± 6.68   | 39.58 ± 10.23  |
| right flexion            | 49.5 ± 19.23   | 52.64 ± 19.05  | 40.4 ± 10.74            | 49.64 ± 14.59 | 42.93 ± 9.41   | 46.23 ± 10.99  |
| left flexion             | 40.07 ± 9.04   | 43.1 ± 2.51    | 33.41 ± 10.3            | 43.54 ± 13.17 | 38.39 ± 10.84  | 40.9 ± 10.46   |
| PT/weight (Nm/kg):180°/s |                |                |                         |               |                |                |
| right extension          | 82.29 ± 19.87  | 86.48 ± 23.06  | 71.43 ± 17.35           | 81.35 ± 19.8  | 73.53 ± 19.15  | 78.92 ± 23.46  |
| left extension           | 71.02 ± 12.37  | 74.88 ± 14.0   | 61.73 ± 15.76           | 69.36 ± 14.6  | 59.7 ± 14.55   | 62.96 ± 16.24  |
| right flexion            | 70.28 ± 23.06  | 77.08 ± 22.31  | 61.55 ± 17.14           | 76.26 ± 13.09 | 68.15 ± 13.93  | 73 ± 13.72     |
| left flexion             | 68.38 ± 10.05  | 74.32 ± 14.07  | 51.8 ± 12.89            | 67.02 ± 13.84 | 61.03 ± 17.14  | 65.03 ± 15.37  |
| Endurance: (180°/s)      |                |                |                         |               |                |                |
| right extension          | 1.44 ± 2.4     | 0.77 ± 0.35    | 1.22 ± 0.47             | 0.87 ± 0.3    | 1.47 ± 2.13    | 0.8 ± 0.24     |
| left extension           | 0.84 ± 0.3     | 0.9 ± 0.56     | 1.0 ± 0.46              | 0.78 ± 0.12   | 0.76 ± 0.25    | 0.79 ± 0.12    |
| Right flexion            | 0.82 ± 0.2     | 1.02 ± 0.33    | 1.01 ± 0.39             | 1.23 ± 0.44   | 0.82 ± 0.2     | 0.98 ± 0.61    |
| left flexion             | 1.32 ± 1.47    | 1.26 ± 1.7     | 0.88 ± 0.37             | 1.08 ± 0.35   | 0.91 ± 0.2     | 0.81 ± 0.22    |

**Table S2.** Neuromuscular function of ankle at baseline and 12 weeks in Tai Chi Chuan group, Core Stability Training group, and Control group.

| Parameters               | Tai Chi Chuan |               | Core Stability Training |              | Control Group |               |
|--------------------------|---------------|---------------|-------------------------|--------------|---------------|---------------|
|                          | Baseline      | Week 12       | Baseline                | Week 12      | Baseline      | Week 12       |
| PT (Nm): 60°/s           |               |               |                         |              |               |               |
| right plantar flexion    | 17.09 ± 8.24  | 24.27 ± 7.96  | 14.08 ± 4.61            | 18.02 ± 4.38 | 16.13 ± 6.95  | 16.7 ± 5.18   |
| left plantar flexion     | 13.37 ± 5.6   | 18.67 ± 6.25  | 12.19 ± 3.79            | 15.1 ± 5.62  | 11.35 ± 5.63  | 12.9 ± 4.68   |
| right dorsiflexion       | 19.24 ± 7.36  | 26.66 ± 7.71  | 18.15 ± 6.44            | 21.62 ± 5.13 | 19.39 ± 4.98  | 20.36 ± 5.59  |
| PT/weight (Nm/kg): 60°/s |               |               |                         |              |               |               |
| right plantar flexion    | 26.57 ± 7.63  | 36.18 ± 9.43  | 22.26 ± 7.74            | 28.05 ± 5.65 | 26.66 ± 13.22 | 26.97 ± 9.61  |
| left plantar flexion     | 23.19 ± 9.59  | 30.64 ± 9.25  | 19.1 ± 5.78             | 26.6 ± 9.34  | 18.08 ± 8.7   | 20.43 ± 8.07  |
| right dorsiflexion       | 33.62 ± 13.34 | 45.32 ± 10.64 | 28.67 ± 9.89            | 33.8 ± 6.71  | 31.64 ± 11    | 33.18 ± 11.74 |
| left dorsiflexion        | 24.52 ± 12.93 | 34.16 ± 7.34  | 18.98 ± 5.74            | 31.43 ± 8.37 | 19.43 ± 7.69  | 22.89 ± 6.22  |
| Endurance: (60°/s)       |               |               |                         |              |               |               |
| right dorsiflexion       | 0.83 ± 0.3    | 1.07 ± 0.37   | 1.14 ± 0.42             | 1.0 ± 0.22   | 1.61 ± 1.47   | 1.05 ± 0.23   |
| left dorsiflexion        | 0.75 ± 0.31   | 1.00 ± 0.39   | 1.71 ± 1.91             | 1.39 ± 1.71  | 3.49 ± 7.38   | 0.87 ± 0.19   |
